# Supplementary material for: Can paternal leakage maintain sexually antagonistic polymorphism in the cytoplasm?
Source: PubMed Central journal article supplement (PMC4413368; doi:10.1111/jeb.12582), 2015-02-27
Supplement: jeb0028-0468-sd1.pdf [file jeb0028-0468-sd1.pdf]

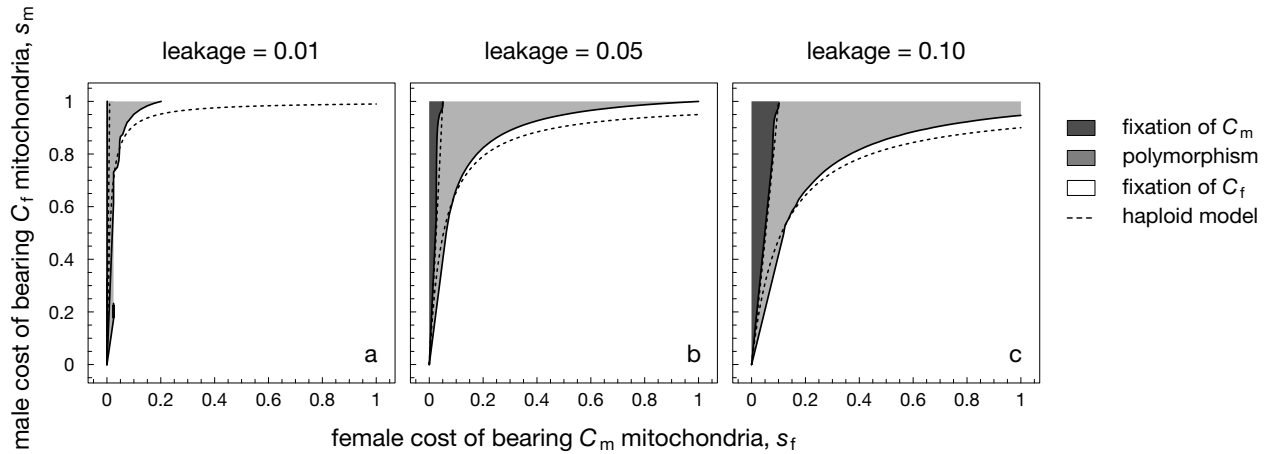

Figure S1:

619 **Figure S1** Cytoplasmic polymorphism with multiple mitochondria per individual and the shape of male  
 620 and female fitness functions is given by a linear function (additive). The model predicts polymorphism  
 621 to be slightly less likely in comparison to the haploid model (dashed lines). This is because this model  
 622 uses a conservative cut-off point of 0.05 to define polymorphism. Parameters:  $M = 200$ ,  $\mu = 1 \times 10^{-5}$ .

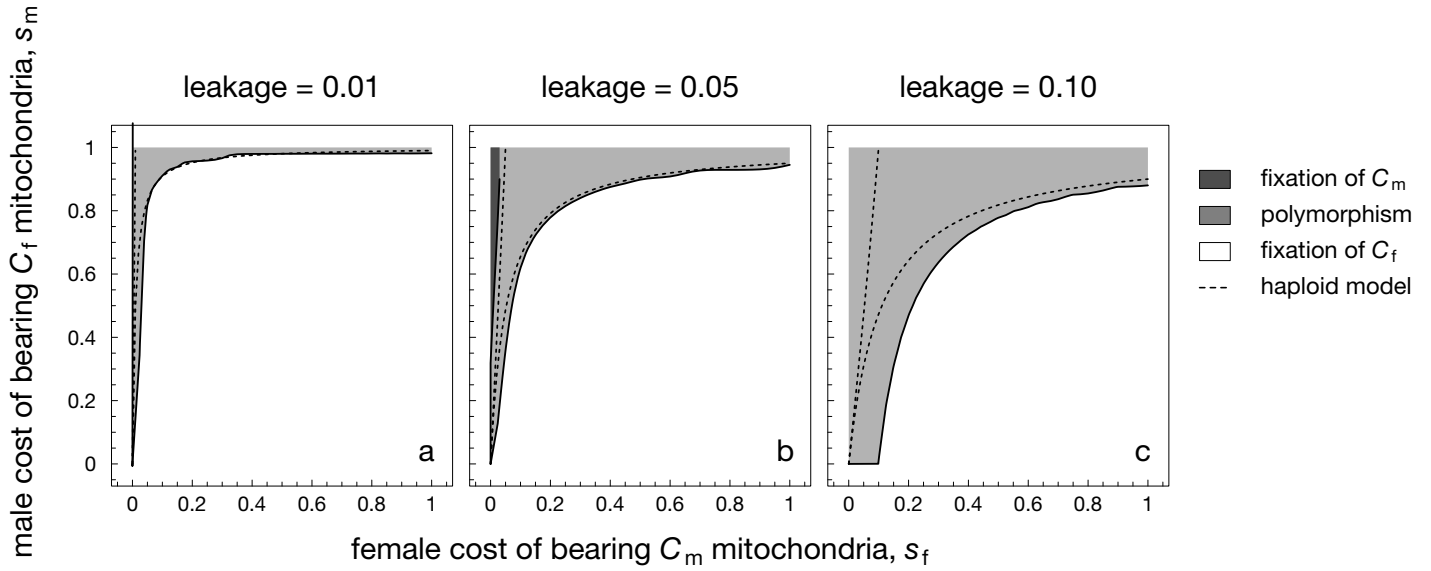

Figure S2:

623 **Figure S2** Cytoplasmic polymorphism when multiple mitochondria per individual are present and the  
 624 shape of male and female fitness functions is given by a sigmoidal function (see Figure 2D). The region  
 625 in which a cytoplasmic polymorphism occurs is similar relative to the haploid model (dashed lines). The  
 626 function of the sigmoidal is given by  $w_f = 1 - s_f + s_f \exp[-k(M-m)/M] / \{1 + \exp[-k(n = M-m)/M]\}$   
 627 and  $w_m = 1 - s_m + s_m \exp[k(M-m)/M] / \{1 + \exp[k(M-m)/M]\}$ , where  $k = 0.1$ . Parameters:  $M = 200$ ,  
 628  $\mu = 1 \times 10^{-5}$ ,  $B = 200$ .

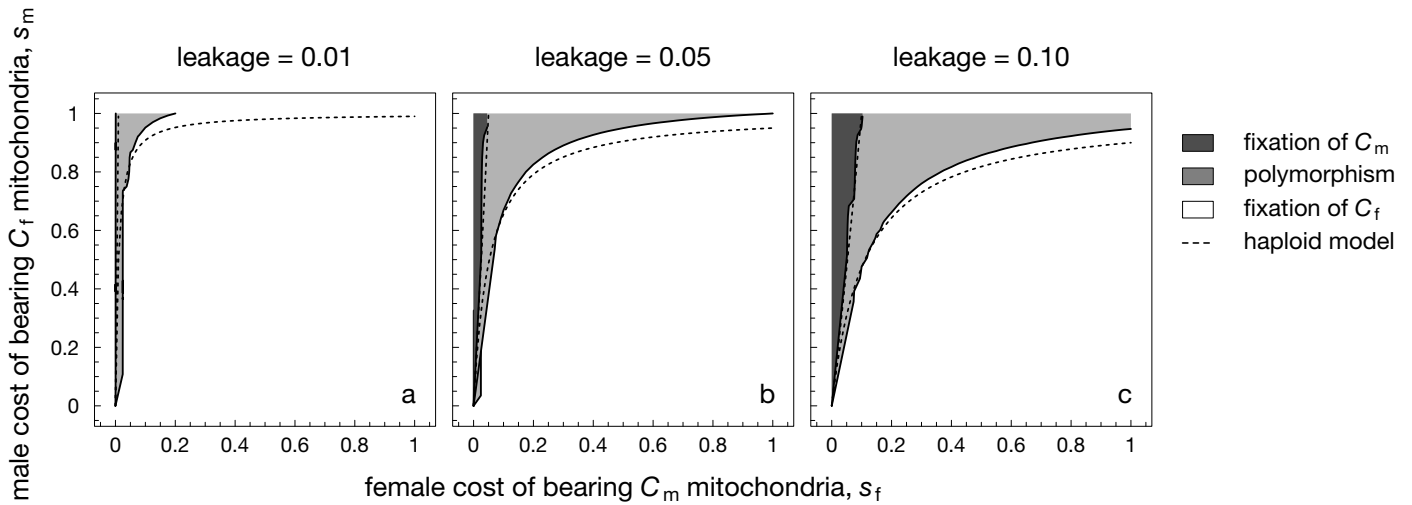

Figure S3:

629 **Figure S3** Cytoplasmic polymorphism when the shape of male and female fitness functions is additive  
 630 and the size of the bottleneck  $B = 10$ . Although the region of polymorphism is slightly smaller relative to  
 631 the haploid model, this is due to the conservative demarcation of the region of polymorphism at  $p = 0.05$   
 632 for the model in which each individual contains multiple cytoplasmic elements. A comparison with  
 633 relative to Figure S1 (no bottleneck) shows that bottlenecks have little effect when fitness is additive.  
 634 Parameters:  $M = 200$ ,  $\mu = 1 \times 10^{-5}$ ,  $B = 10$ .

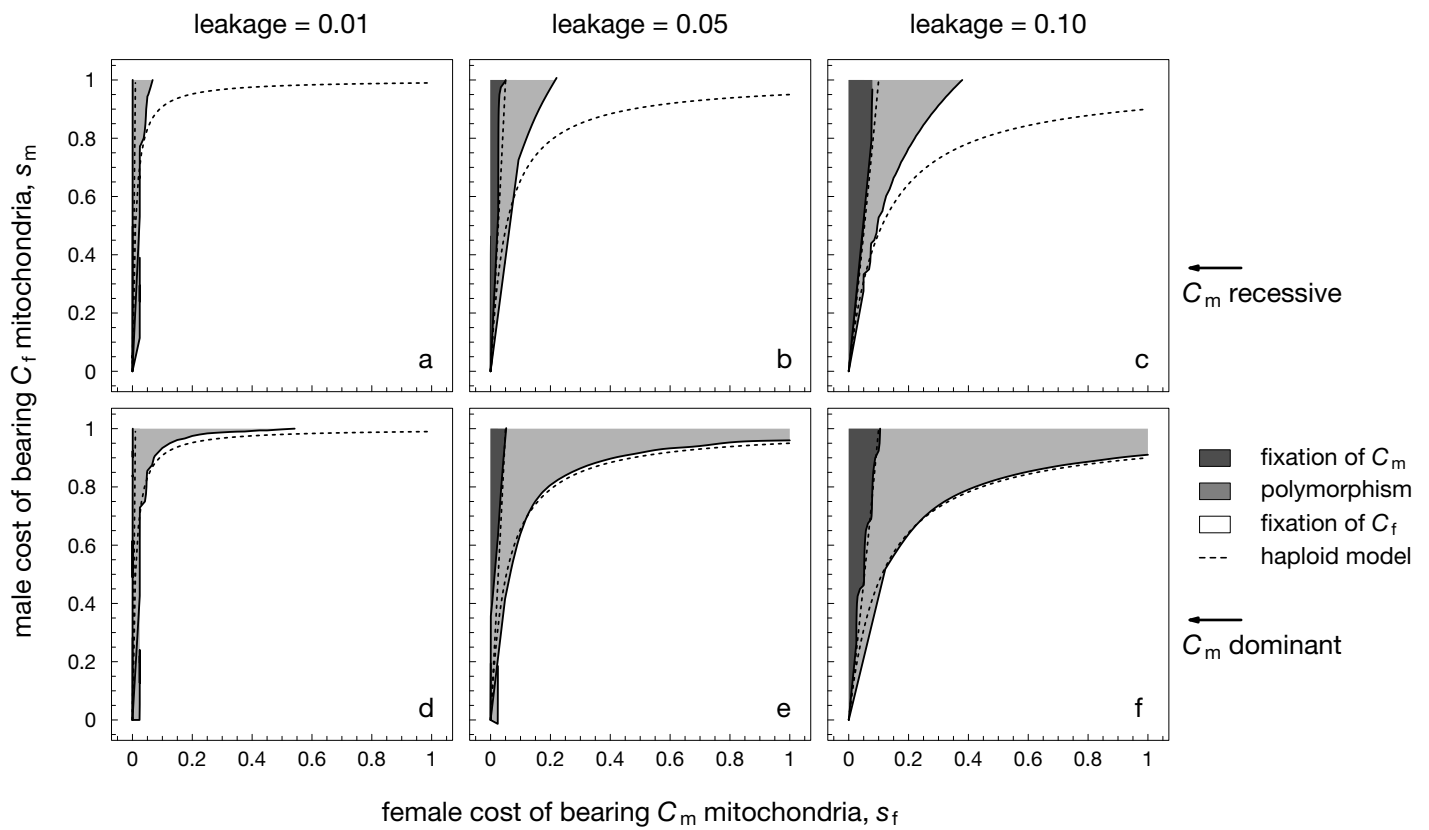

Figure S4:

635 **Figure S4** Cytoplasmic polymorphism when the shape of male and female fitness functions is given  
 636 by a scenario of constant dominance (solid lines in Figure 2B,C) and the size of the bottleneck  $B = 10$ .  
 637 Outcomes are similar to a scenario without bottlenecks in Figure 4. Parameters:  $M = 200$ ,  $\mu = 1 \times$   
 638  $10^{-5}$ ,  $B = 10$ .
