# Supplementary material for: Can paternal leakage maintain sexually antagonistic polymorphism in the cytoplasm?
Source: PubMed Central journal article supplement (PMC4413368; doi:10.1111/jeb.12582), 2015-02-27
Supplement: jeb0028-0468-sd2.pdf [file jeb0028-0468-sd2.pdf]

643 Supplementary Information to:

644 Can paternal leakage maintain sexually antagonistic polymorphism in the cytoplasm?

645 Bram Kuijper, Nick Lane & Andrew Pomiankowski

646 **Model with multiple mitochondria**

647 Following the model by Hadjivasiliou *et al.* (2012), we study a species with separate sexes, whose ga-  
648 metes contain multiple mitochondria. Let  $M$  denote the number of mitochondria present in each cell and  
649 let  $j$  describe the number of mitochondria which carry a  $C_m$ -allele ( $j \in \{0, 1, \dots, M\}$ ), implying that  $M - j$   
650 mitochondria in the same cell carry the  $C_f$ -allele. The frequency of cells which contain  $j$   $C_m$ -mitochondria  
651 prior to reproduction is denoted by  $p_{0,f}(j)$  in females and  $p_{0,m}(j)$  in males.

652 **S1.1 Mitochondrial mutation**

653 Analogous to recent models of sexually antagonistic polymorphisms in nuclear genomes (e.g., Connal-  
654 Ion & Clark, 2012; Mullon *et al.*, 2012), we assume the presence of recurrent mitochondrial mutation.  
655 Specifically, each mitochondrial allele mutates with probability  $\mu$ . Hence, in order to compute the rela-  
656 tive frequency of each genotype  $p_{x,1}(j)$  in sex  $x \in \{m, f\}$  subsequent to mutation, we need to assess the  
657 probability of mutation from all possible other genotypes  $k \neq j$ . Writing the genotype frequencies  $p_x(j)$   
658 in vector form,  $\mathbf{p}_0 = [p_m(0), p_m(1), \dots, p_m(M), p_f(0), p_f(1), \dots, p_f(M)]^T$  (where T denotes transposition),  
659 we have

660 
$$\mathbf{p}_1 = \mathbf{U}\mathbf{p}_0, \tag{S1}$$
  
661

662 where  $\mathbf{U} = \begin{bmatrix} \mathbf{u} & \mathbf{0} \\ \mathbf{0} & \mathbf{u} \end{bmatrix}$  is a  $2(M+1) \times 2(M+1)$  block diagonal matrix of which entry  $u(k, \ell)$  describes the prob-  
663 ability of mutating from genotype  $\ell$  to genotype  $k$ . Following Hadjivasiliou *et al.* (2012), we assume that  
664 each mitochondrial gene only mutates once during an individual's lifespan. Hence, given a probability

665 of mutation of  $\mu$  for each gene, the entry  $u_{k\ell}$  is given by

$$666 \quad u_{k\ell} = \sum_{g_2=0}^{M-\ell} \sum_{g_1=0}^{\ell} \text{Binom}(x = g_1, \mu, \ell) \text{Binom}(x = g_2, \mu, M - \ell) \delta_{\ell - g_1 + g_2 = k}, \quad (\text{S2})$$

667

668 where Kronecker's delta indicates that only those combinations are incorporated which result in the  
669 desired number of  $k C_m$  alleles.

## 670 **S1.2 Fitness**

671 See main text for a description of the fitness effects.

672 **Recursions** The frequencies  $p_{2,m}(j)$  and  $p_{2,f}(j)$  of mitochondrial type  $j$  after selection in males and  
673 females respectively subsequent to selection are given by

$$674 \quad p_{2,m}(j) = \frac{w_m(j)p_{1,m}(j)}{\bar{w}_m} \quad (\text{S3a})$$

$$675 \quad p_{2,f}(j) = \frac{w_f(j)p_{1,f}(j)}{\bar{w}_f}, \quad (\text{S3b})$$

676

677 where  $\bar{w}_x = \sum_{j=0}^n p_{1,x}(j)w_x(j)$  is the mean fitness for sex  $x$ .

## 678 **S1.3 Bottlenecks**

679 First,  $M$  mitochondria are sampled without replacement down to  $B$  mitochondria. Subsequently, in the  
680 newly divided cell, mitochondria are randomly selected with replacement to divide again until a number  
681 of  $M$  is restored. Let the vector  $\mathbf{p}_3$  denote the frequency distribution of mitochondrial genotypes after the  
682 bottleneck. We then have

$$683 \quad \mathbf{p}_2 = \mathbf{A}\mathbf{p}_2$$

684

685 where  $\mathbf{A} = \begin{bmatrix} \mathbf{b} & \mathbf{0} \\ \mathbf{0} & \mathbf{b} \end{bmatrix}$  is again a block diagonal matrix with entry  $b_{k\ell}$  given by

$$686 \quad b_{\ell \rightarrow k} = \sum_{h_2=0}^M \sum_{h_1=0}^B P_{B_1}(\ell \rightarrow h_1) P_{B_2}(h_1 \rightarrow k)$$

687

688 where  $P_{B_1}(\ell \rightarrow h_1)$  is the transition probability from a cell that contains  $\ell$  alleles preceding the bottleneck  
 689 and  $h_1$  alleles afterwards, according to a hypergeometric distribution

$$690 \quad P_{\text{Bottleneck}}(\ell \rightarrow h_1) = \frac{\binom{\ell}{h_1} \binom{M-\ell}{B-h_1}}{\binom{M}{B}}$$

691

692 where  $P_{B_2}(h_1 \rightarrow k)$  reflects the transition probability from  $h_1$   $C_m$  alleles following the bottleneck to  $k$   
 693 alleles after re-sampling back to  $M$  mitochondria. This is given by a binomial distribution with

$$694 \quad P_{B_2}(h_1 \rightarrow k) = 1, \quad \text{when } k = 0 \text{ and } h_1 = 0$$

$$695 \quad P_{B_2}(h_1 \rightarrow k) = \binom{M}{k} \left(\frac{h_1}{B}\right)^k \left(\frac{B-h_1}{B}\right)^{M-k}$$

696

## 697 **S1.4 Meiosis I and II**

698 **Meiosis I** In meiosis I, each mitochondrion is duplicated and then two daughter cells are formed by  
 699 random segregation. Each receives a random sample of the  $2M$  mitochondria present in the parent cell.  
 700 Let  $a_{k\ell}$  reflect the probability that a mother cell with  $\ell$  mitochondria gives rise to a daughter cell with  $k$   
 701 mitochondria. Again we have a similar block matrix dynamic as previously

$$702 \quad \mathbf{p}_5 = \mathbf{E}_1 \mathbf{p}_4,$$

703

704 in which element  $\varepsilon_{1,k\ell}$  in the diagonal blocks of the matrix  $\mathbf{E}_1$  is given by

$$705 \quad \varepsilon_{1,k\ell} = \frac{\binom{2\ell}{k} \binom{2(M-\ell)}{M-k}}{\binom{2M}{M}}.$$

706

707 **Meiosis II** In meiosis II, each newly formed diploid daughter cell now divides into two gametes, each  
 708 containing  $M/2$  mitochondria through random segregation. The vector  $\mathbf{p}_6$  is the distribution of mitotype  
 709 numbers after meiosis II, which contains zeros for frequencies  $p_f(j)$  and  $p_m(j)$  where  $j > M/2$ . Given  
 710 the dynamic  $\mathbf{p}_6 = \mathbf{E}_2 \mathbf{p}_5$ , the transition matrix  $\mathbf{E}_2$  is given by

$$\mathbf{E}_2 = \begin{bmatrix} \mathbf{e} & \mathbf{0} \\ \mathbf{0} & \mathbf{0} \\ \mathbf{0} & \mathbf{e} \\ \mathbf{0} & \mathbf{0} \end{bmatrix}$$

713 with elements

$$\varepsilon_{2,k\ell} = \frac{\binom{\ell}{k} \binom{M-\ell}{M/2-k}}{\binom{M}{M/2}}$$

## 716 S1.5 Syngamy

717 **Uniparental inheritance** We assume that the mitochondrial genome of one parent is discarded, and  
 718 that of the other is doubled through sampling with replacement. The distribution of genotypes is then  
 719 given by the vector  $\mathbf{p}_7 = \mathbf{S} \mathbf{p}_6$ , where

720  $\mathbf{S} = \begin{bmatrix} \mathbf{0} & \mathbf{s} \end{bmatrix}$ . Elements of the sub-matrices  $\mathbf{s}$  are given by

$$s_{k\ell} = \binom{M}{k} \binom{2\ell}{M}^k \binom{M-2\ell}{M}^{M-k}.$$

723 **Paternal leakage** Given paternal leakage,  $0 < \pi < \frac{M}{2}$  denotes the number of mitochondria inherited  
 724 from the father, so  $0 < 1 - \pi < \frac{M}{2}$  mitochondria are inherited from the mother. After syngamy, the  
 725 resulting set of  $M/2$  mitochondria is duplicated until the required number of  $M$  zygotic mitochondria is  
 726 reached. Consider a sperm cell that has a number of  $r_m C_m$  mitochondria, whereas the egg contains  $r_f$   
 727  $C_f$  mitochondria. Let  $0 < j_m < \pi$  be the number of  $C_m$  mitochondria among those mitochondria that are  
 728 inherited through sperm. Similarly, let  $0 < j_f < 1 - \pi$  be the number of  $C_m$  mitochondria that are inherited

729 through the egg, where the total contribution of  $C_m$  mitochondria is  $k = j_f + j_m$ . Hence, we have

$$730 \quad p_7(k) = \sum_{j_m=0}^{\pi} \sum_{r_m=0}^{M/2} \sum_{r_f=0}^{M/2} p_{m6}(r_m) p_{f6}(r_f) \epsilon(r_m \rightarrow j_m, \pi) \epsilon(r_f \rightarrow k - j_m, 1 - \pi)$$

731

732 where  $\epsilon(r \rightarrow j, x)$  reflects the probability that a gamete cell containing a number of  $r$   $C_m$ -mitochondria  
 733 contributes  $0 \leq j \leq x$   $C_m$  mitochondria to the zygote. Hence,  $\epsilon(r \rightarrow j, x)$  is given by

$$734 \quad \epsilon(r \rightarrow j, x) = \frac{\binom{r}{j} \binom{M/2-r}{x-j}}{\binom{M/2}{x}}.$$

735

736 Subsequently, the  $M/2$  mitochondria are duplicated by re-sampling until the required number of  $n$  zygotic  
 737 mitochondria is achieved, or

$$738 \quad p_8(k) = \sum_{z=0}^{M/2} p_7(z) \binom{M}{k} \left(\frac{2z}{M}\right)^k \left(\frac{M-2z}{M}\right)^{M-k}$$

739

## 740 **S1.6 Analysis**

741 We numerically iterated recursions for  $\mathbf{p}$  by coding a system of  $2(M+1) \times 2(M+1)$  recursion equations  
 742 in C. We assumed that equilibria are reached when the differences in mitotype frequencies between  
 743 subsequent time steps are smaller than  $1 \times 10^{-7}$ .
